# Supplementary material for: Hospital Staff’s Adherence to Information Security Policy: A Quest for the Antecedents of Deterrence Variables
Source: PubMed Central journal article supplement — Inquiry. 2021 Jul 7;58:00469580211029599. doi: 10.1177/00469580211029599 (PMC8576356; doi:10.1177/00469580211029599), 2021-07-07
Supplement: Appendix.pdf [file Appendix.pdf]

Appendix. Questionnaire items

| Constructs                      | Items                                                                                                                                                                                                                                                                                                                                                      | Source |
|---------------------------------|------------------------------------------------------------------------------------------------------------------------------------------------------------------------------------------------------------------------------------------------------------------------------------------------------------------------------------------------------------|--------|
| Top management support          | Hospital administration takes serious action on those who disobey information security policies.<br>Hospital administration always appreciates the adoption of practicing sufficient information security behavior.<br>Hospital administration has make it clear in no uncertain terms that disobeying information security policies will not be allowed.  | 40,63  |
| SETA programs                   | My hospital provides training to improve employee's awareness of information security issues.<br>My hospital provides employees with education on information security related laws.<br>In my hospital, employees are briefed on the repercussions of altering electronic data in an unauthorized way.                                                     | 17     |
| Internal auditing effectiveness | Internal auditing reviews operations to determine whether results are in line with established goals of information security policies of my hospital.<br>Internal auditing makes recommendations for improving the hospital information security policies when appropriate.<br>Internal auditing improves information security performance of my hospital. | 52     |
| Punishment severity             | My hospital disciplines employees who violate information security policies.<br>My hospital terminates employees who repeatedly break information security rules.<br>If employees were caught violating hospital information security policies, they would be severely punished.                                                                           | 62     |
| Punishment certainty            | If employees do not follow hospital information security policies, they will be penalized.<br>Employees would be formally sanctioned if management learned that they had violated hospital information security policies.<br>Employees would be formally punished if they violated the hospital information security policies.                             | 64     |

Appendix. Questionnaire items (*cont.*)

| Constructs                         | Items                                                                                                                                                                                                                                                                                                                                                   | Source |
|------------------------------------|---------------------------------------------------------------------------------------------------------------------------------------------------------------------------------------------------------------------------------------------------------------------------------------------------------------------------------------------------------|--------|
| Intention to<br>comply with<br>ISP | I intend to comply with the information security policies of my hospital.<br>I intend to protect information and technology resources according to the information security policies of my hospital.<br>I intend to carry out my responsibilities prescribed in the information security policies of my hospital when I use information and technology. | 60     |

*Note:* ISP denotes Information Security Policy
